# Supplementary material for: Relationship between Malaria Incidence and IgG Levels to Plasmodium falciparum Merozoite Antigens in Malian Children: Impact of Hemoglobins S and C
Source: PLoS One. 2013 Mar 28;8(3):e60182. doi: 10.1371/journal.pone.0060182 (PMC3610890; doi:10.1371/journal.pone.0060182)
Supplement: Table S1 — Detail of Malian children pairs. (XLSX) [file pone.0060182.s002.xlsx]

## Sheet: Sheet1
pair	HbAS or HbAC							HbAA
	Age	Sex	ABO	Rh	G6PD	Athal		Age	Sex	ABO	Rh	G6PD	Athal
AS-AA pair	3	M	A	Negative	A+	WT		3	F	B	Positive	A+	WT
AS-AA pair	3	M	A	Positive	A+	HE		3	F	A	Positive	A+	HE
AS-AA pair	3	M	A	Positive	A+	HE		3	F	A	Negative	A+	HE
AS-AA pair	3	M	A	Positive	A+	HE		3	F	A	Negative	A+	HE
AS-AA pair	3	M	A	Positive	A+	WT		3	M	A	Positive	A+	WT
AS-AA pair	3	F	A	Positive	A+	HE		3	F	A	Positive	A+	HE
AS-AA pair	3	F	AB	Positive	A+/-	WT		3	M	AB	Positive	A+	WT
AS-AA pair	3	M	B	Positive	A+	WT		3	M	B	Positive	A+	WT
AS-AA pair	3	F	B	Positive	A+	WT		3	F	B	Positive	A+	WT
AS-AA pair	3	M	O	Positive	A+	NA		3	F	O	Positive	A+	HO
AS-AA pair	3	M	O	Positive	A+	HE		3	M	O	Positive	A+	HE
AS-AA pair	3	F	O	Positive	A+	HE		3	F	O	Positive	A+	HE
AS-AA pair	3	F	O	Positive	A+	WT		3	F	O	Positive	A+	WT
AS-AA pair	4	M	A	Positive	A+	WT		4	M	A	Positive	A+	WT
AS-AA pair	4	M	A	Positive	A+	WT		4	M	A	Negative	A+	WT
AS-AA pair	4	F	B	Negative	A+/-	WT		4	F	B	Positive	A+/-	WT
AS-AA pair	4	F	O	Positive	A+	WT		4	F	O	Positive	A+	WT
AS-AA pair	5	F	A	Positive	A+	HE		5	F	A	Positive	A+	HE
AS-AA pair	5	F	AB	Positive	A+	WT		5	F	AB	Positive	A+	WT
AS-AA pair	5	M	B	Positive	A+	WT		5	M	B	Positive	A+	WT
AS-AA pair	5	M	O	Positive	A+	HE		5	M	O	Positive	A+	HE
AS-AA pair	5	M	O	Positive	A+	WT		5	F	B	Negative	A+	WT
AS-AA pair	5	M	O	Positive	A+	WT		5	F	B	Negative	A+	WT
AS-AA pair	5	M	O	Positive	A+	HE		5	M	O	Positive	A+	HE
AS-AA pair	5	F	O	Positive	A+	WT		5	F	O	Positive	A+	WT
AS-AA pair	6	M	A	Negative	A+	WT		6	M	A	Positive	A+	WT
AS-AA pair	6	F	A	Positive	A+	WT		6	M	A	Positive	A+	WT
AS-AA pair	6	M	AB	Positive	A+	WT		6	M	AB	Positive	A+	WT
AS-AA pair	6	F	B	Positive	A+	HE		6	F	B	Positive	A+	HE
AS-AA pair	6	F	B	Positive	A+	WT		6	F	B	Positive	A+	WT
AS-AA pair	6	M	O	Positive	A+	HE		6	M	O	Positive	A+	HE
AS-AA pair	6	M	O	Positive	A+	WT		6	M	O	Positive	A+	WT
AS-AA pair	6	F	O	Positive	A+	WT		6	F	O	Positive	A+	WT
AS-AA pair	6	F	O	Positive	A+/-	WT		6	F	A	Positive	A+/-	WT
AS-AA pair	7	M	A	Positive	A+	WT		7	M	A	Positive	A+	WT
AS-AA pair	7	M	A	Positive	A+	WT		7	M	A	Positive	A+	WT
AS-AA pair	7	F	A	Positive	A+	WT		7	M	A	Negative	A+	WT
AS-AA pair	7	F	A	Positive	A+	WT		7	F	B	Positive	A+	WT
AS-AA pair	7	F	A	Positive	A+	WT		7	M	O	Positive	A+	WT
AS-AA pair	7	F	A	Positive	A+	WT		7	F	A	Positive	A+	WT
AS-AA pair	7	F	AB	Positive	A+	WT		7	F	AB	Positive	A+	WT
AS-AA pair	7	M	B	Positive	A+	HE		7	F	AB	Positive	A+	HE
AS-AA pair	7	F	B	Positive	A+	HE		7	F	A	Positive	A+	HE
AS-AA pair	7	F	B	Positive	A+	HE		7	F	A	Positive	A+	HE
AS-AA pair	7	M	O	Positive	A-	WT		7	M	O	Positive	A-	WT
AS-AA pair	7	M	O	Positive	A-	WT		7	M	B	Positive	A-	WT
AS-AA pair	7	F	O	Positive	A+/-	WT		7	F	O	Positive	A+	WT
AS-AA pair	8	M	A	Positive	A+	HE		8	M	B	Positive	A+	HE
AS-AA pair	8	M	A	Negative	A+	WT		8	F	A	Negative	A+	WT
AS-AA pair	8	M	A	Positive	A+	WT		8	M	A	Positive	A+	WT
AS-AA pair	8	M	AB	Positive	A+	WT		8	M	AB	Positive	A+	WT
AS-AA pair	8	F	B	Positive	A+	WT		8	F	A	Positive	A+	WT
AS-AA pair	8	M	O	Positive	A+	WT		8	M	O	Positive	A+	WT
AS-AA pair	8	M	O	Positive	A-	WT		8	M	O	Negative	A-	WT
AS-AA pair	9	F	A	Positive	A+/-	HE		9	F	A	Positive	A+/-	WT
AS-AA pair	9	F	A	Positive	A+	HE		9	F	A	Positive	A+	HE
AS-AA pair	9	M	AB	Positive	A+	WT		9	M	O	Positive	A+	WT
AS-AA pair	9	M	B	Positive	A+	WT		9	M	B	Positive	A+	WT
AS-AA pair	9	F	B	Positive	A+	WT		9	F	O	Positive	A+	WT
AS-AA pair	9	F	B	Positive	A+	WT		9	F	B	Positive	A+	WT
AS-AA pair	9	F	O	Positive	A+	WT		9	F	O	Positive	A+	WT
AS-AA pair	9	F	O	Positive	A+	WT		9	F	O	Positive	A+	WT
AS-AA pair	10	M	B	Positive	A+	WT		10	M	A	Positive	A+	WT
AS-AA pair	10	M	B	Positive	A+	WT		10	M	B	Positive	A+	WT
AS-AA pair	10	M	O	Positive	A+	WT		10	M	O	Positive	A+	WT
AS-AA pair	10	M	O	Positive	A+	WT		10	M	O	Positive	A+	WT
AS-AA pair	10	F	O	Positive	A+	WT		10	F	O	Positive	A+	WT
AS-AA pair	11	M	A	Positive	A+	WT		11	M	A	Positive	A+	WT
AS-AA pair	11	F	A	Positive	A+	WT		11	F	A	Positive	A+	WT
AS-AA pair	11	M	B	Positive	A+	WT		11	M	B	Positive	A+	WT
AS-AA pair	11	M	O	Positive	A+	HE		11	M	O	Positive	A+	HE
AS-AA pair	11	M	O	Positive	A+	WT		11	M	O	Positive	A+	WT
AS-AA pair	11	F	O	Positive	A+/-	NA		11	F	O	Positive	A+/-	WT
AC-AA pair	3	M	A	Positive	A+	HE		3	M	A	Positive	A+	HE
AC-AA pair	3	M	A	Positive	A+	WT		3	M	A	Positive	A+	WT
AC-AA pair	3	M	O	Positive	A+	WT		3	M	O	Positive	A+	WT
AC-AA pair	4	M	A	Positive	A+	WT		4	M	A	Positive	A+	WT
AC-AA pair	4	F	B	Positive	A+	HE		4	F	B	Positive	A+	HE
AC-AA pair	5	F	A	Negative	A-	WT		5	F	A	Negative	A+	WT
AC-AA pair	5	F	A	Positive	A+/-	HO		5	F	A	Positive	A+/-	HE
AC-AA pair	5	F	O	Positive	A+	WT		5	F	O	Positive	A+	WT
AC-AA pair	5	F	O	Positive	A+	WT		5	F	O	Positive	A+	WT
AC-AA pair	5	M	O	Positive	A+	WT		5	M	O	Positive	A+	WT
AC-AA pair	6	F	B	Positive	A+/-	HE		6	F	B	Positive	A+/-	WT
AC-AA pair	6	M	B	Positive	A+	HE		6	M	B	Positive	A+	HE
AC-AA pair	6	F	O	Positive	A+/-	WT		6	M	O	Positive	A+	WT
AC-AA pair	6	F	O	Positive	A+	WT		6	F	O	Positive	A+	WT
AC-AA pair	7	F	A	Positive	A+	WT		7	F	A	Positive	A+	WT
AC-AA pair	7	F	A	Positive	A+	WT		7	F	A	Positive	A+	WT
AC-AA pair	7	F	O	Positive	A+/-	WT		7	F	A	Positive	A+/-	WT
AC-AA pair	7	F	O	Positive	A+	WT		7	F	O	Positive	A+	WT
AC-AA pair	8	M	B	Positive	A+	WT		8	M	B	Positive	A+	WT
AC-AA pair	8	M	O	Positive	A-	WT		8	M	O	Positive	A+	WT
AC-AA pair	8	M	O	Positive	A+	WT		8	M	O	Positive	A+	WT
AC-AA pair	9	F	A	Positive	A+	WT		9	F	A	Positive	A+	WT
AC-AA pair	9	M	A	Positive	A+	WT		9	M	A	Positive	A+	WT
AC-AA pair	9	F	O	Positive	A+/-	HE		9	F	O	Positive	A+/-	HE
AC-AA pair	9	M	O	Negative	A+	HE		9	M	O	Negative	A+	HE
AC-AA pair	9	M	O	Positive	A+	WT		9	M	O	Positive	A+	WT
AC-AA pair	10	M	O	Positive	A+	WT		10	M	AB	Positive	A+	WT
AC-AA pair	11	F	A	Positive	A+	WT		11	F	A	Positive	A+	WT
AC-AA pair	11	F	A	Positive	A+	WT		11	M	O	Positive	A+	HE
AC-AA pair	11	M	O	Positive	A+	HE		11	M	O	Positive	A+	HE
